CORRECTION

# Correction: Spatial-temporal evolution and influencing factors of urban-rural economic circulation in China's agricultural areas: A case study of Jiangnan Plain

Xiaoyue Li

[S1 Table](#) is uploaded incorrectly. Please see the correct [S1 Table](#) here.

## Supporting information

**S1 Table. Index system for the evaluation of UREC.**  
(TIF)

## Reference

1. Li X. Spatial-temporal evolution and influencing factors of urban-rural economic circulation in China's agricultural areas: a case study of Jiangnan Plain. PLoS One. 2025;20(7):e0313355. <https://doi.org/10.1371/journal.pone.0313355> PMID: [40632795](https://pubmed.ncbi.nlm.nih.gov/40632795/)

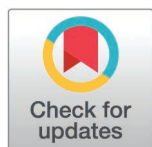

## OPEN ACCESS

**Citation:** Li X (2025) Correction: Spatial-temporal evolution and influencing factors of urban-rural economic circulation in China's agricultural areas: A case study of Jiangnan Plain. PLoS One 20(10): e0335557. <https://doi.org/10.1371/journal.pone.0335557>

**Published:** October 27, 2025

**Copyright:** © 2025 Xiaoyue Li. This is an open access article distributed under the terms of the [Creative Commons Attribution License](#), which permits unrestricted use, distribution, and reproduction in any medium, provided the original author and source are credited.
